# Supplementary material for: Dynamics Studies of Nitrogen Interstitial in GaN from Ab Initio Calculations
Source: MDPI journal article supplement (doi:10.3390/ma13163627), 2020-08-17
Supplement: s1 [file s1]

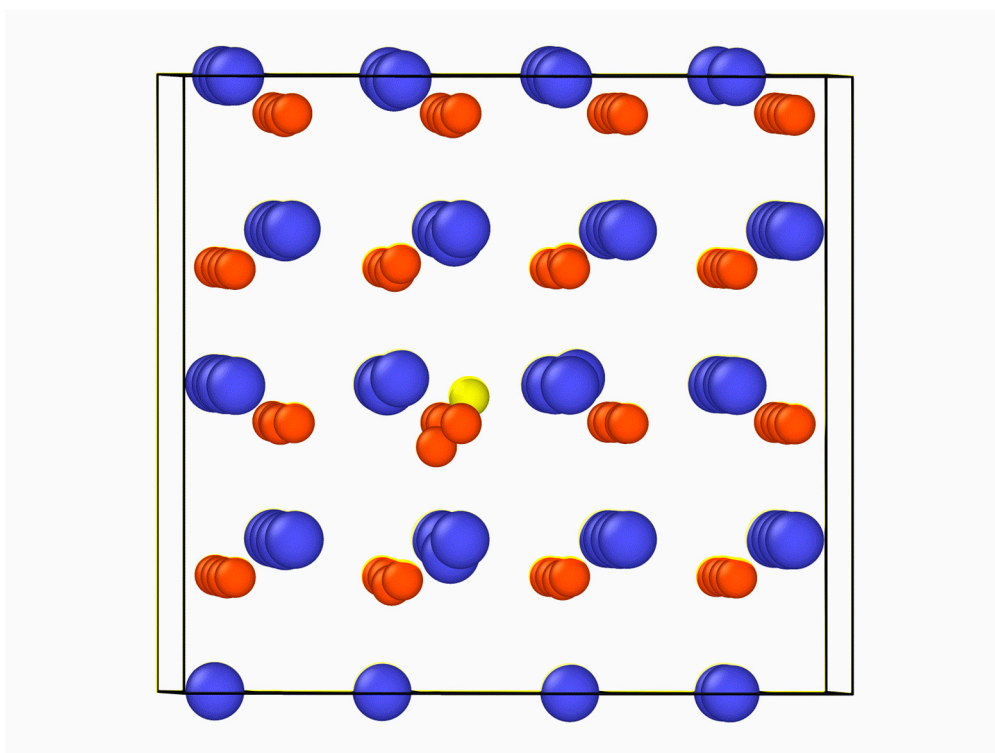

**Figure S1.** Direct migration.

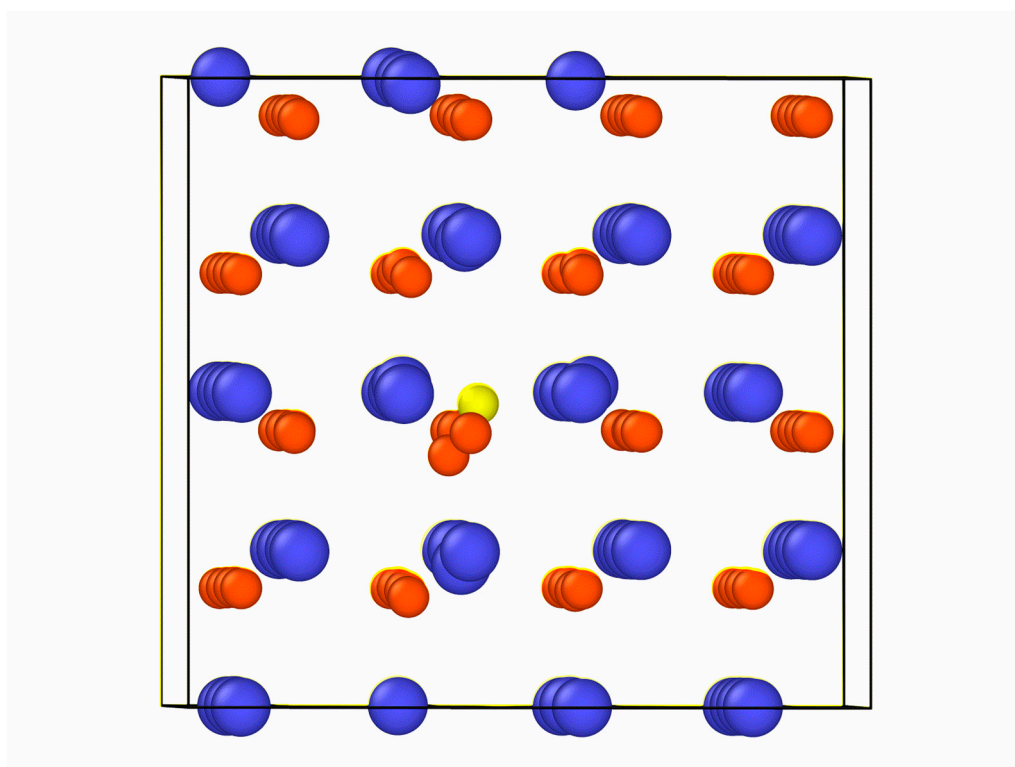

**Figure S2.** Indirect migration.
